# Supplementary material for: Scaffold-supported extracellular matrices preserved by magnesium hydroxide nanoparticles for renal tissue regeneration
Source: Royal Society of Chemistry journal article supplement (doi:10.1039/d0bm00871k), 2020-01-01
Supplement: d0bm00871k1.pdf [file d0bm00871k1.pdf]

## Supplementary data

### **Scaffold-Supported Extracellular Matrices Preserved by Magnesium Hydroxide Nanoparticle for Renal Tissue Regeneration**

*Yun Ah Kim,<sup>1,2</sup> So Young Chun,<sup>3</sup> Sung-Bin Park,<sup>4</sup> Eun Young Kang,<sup>4</sup> Won-Gun Koh,<sup>2</sup> Tae Gyun Kwon,<sup>5</sup> Dong Keun Han,<sup>4,\*</sup> Yoon Ki Joun<sup>1,6,\*</sup>*

*<sup>1</sup>Center for Biomaterials, Biomedical Research Institute, Korea Institute of Science and Technology, Seoul, Korea*

*<sup>2</sup>Department of Chemical and Biomolecular Engineering, Yonsei University, Seoul, Korea*

*<sup>3</sup>BioMedical Research Institute, Kyungpook National University Hospital, Daegu, Korea*

*<sup>4</sup>Department of Biomedical Science, CHA University, Sungnam, Korea*

*<sup>5</sup>Department of Urology, Kyungpook National University, Kyungbuk, Korea*

*<sup>6</sup>Division of Bio-Medical Science and Technology, Korea University of Science and Technology, KIST School, Seoul, Korea*

A

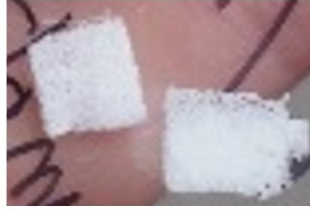

B

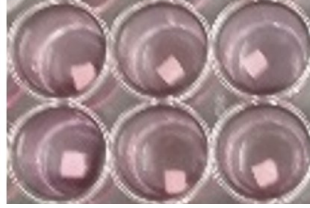

**Figure S1.** Decellularization of fibroblast cultured on PLGA scaffolds. The photo of (A) PLGA/MH scaffold and (B) fibroblast-cultured PLGA/MH scaffold.

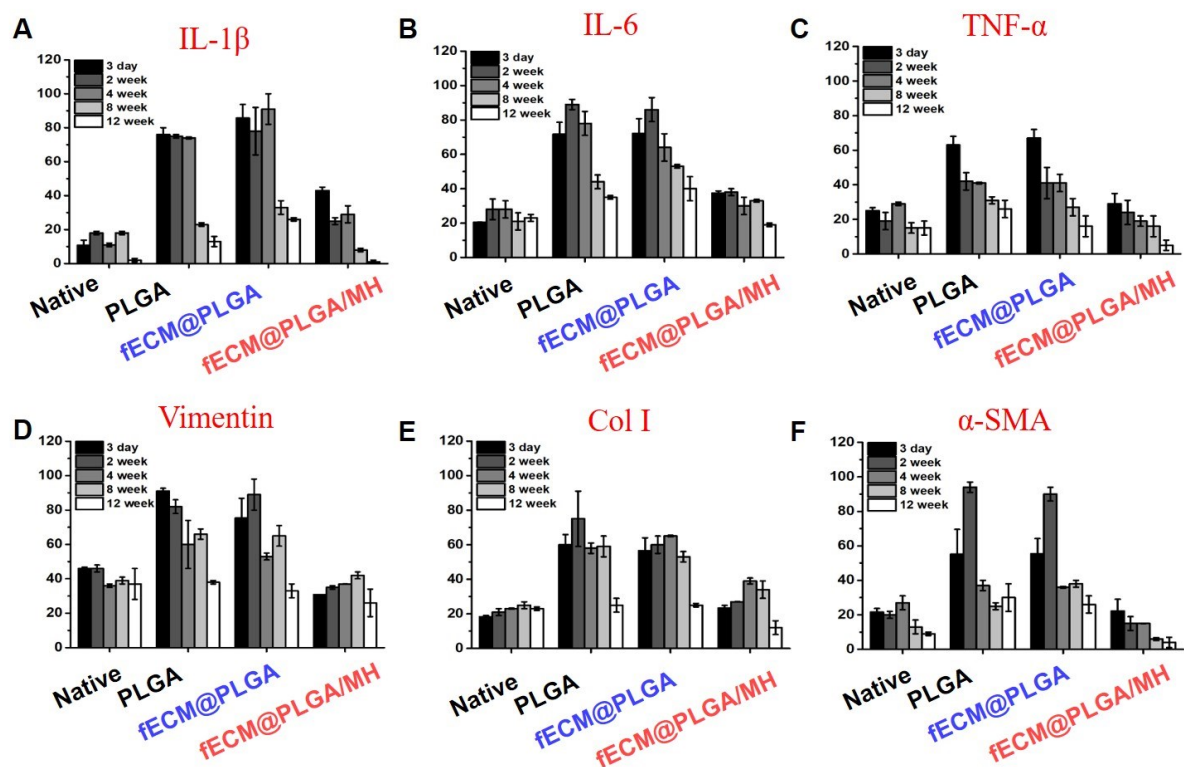

**Figure S2.** *In vivo* inflammation of implanted extracellular scaffolds. Gene expression analysis of inflammatory markers (A) interleukin 1 beta (IL-1 $\beta$ ), (B) interleukin 6 (IL-6), (C) tumor necrosis factor alpha (TNF- $\alpha$ ), and fibrosis markers (D) vimentin, (E) collagen type I (Col I), (F) alpha smooth muscle actin ( $\alpha$ -SMA) by real-time PCR.

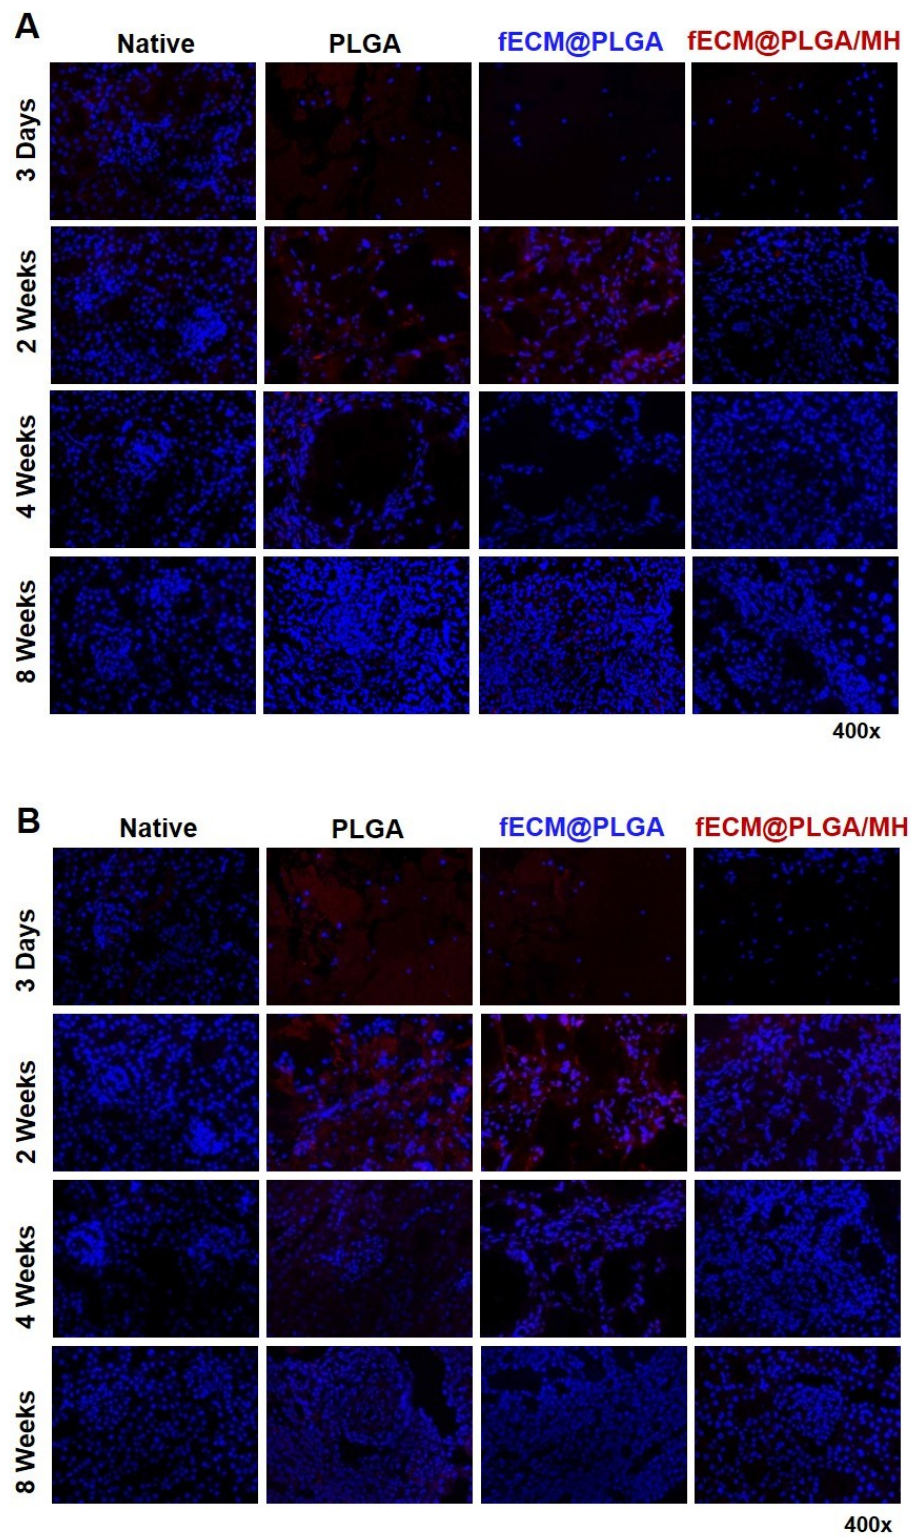

**Figure S3.** *In vivo* regeneration of implanted scaffolds. Fluorescence images obtained by immunostaining of (A) CD4 and (B) TNF-  $\alpha$ .

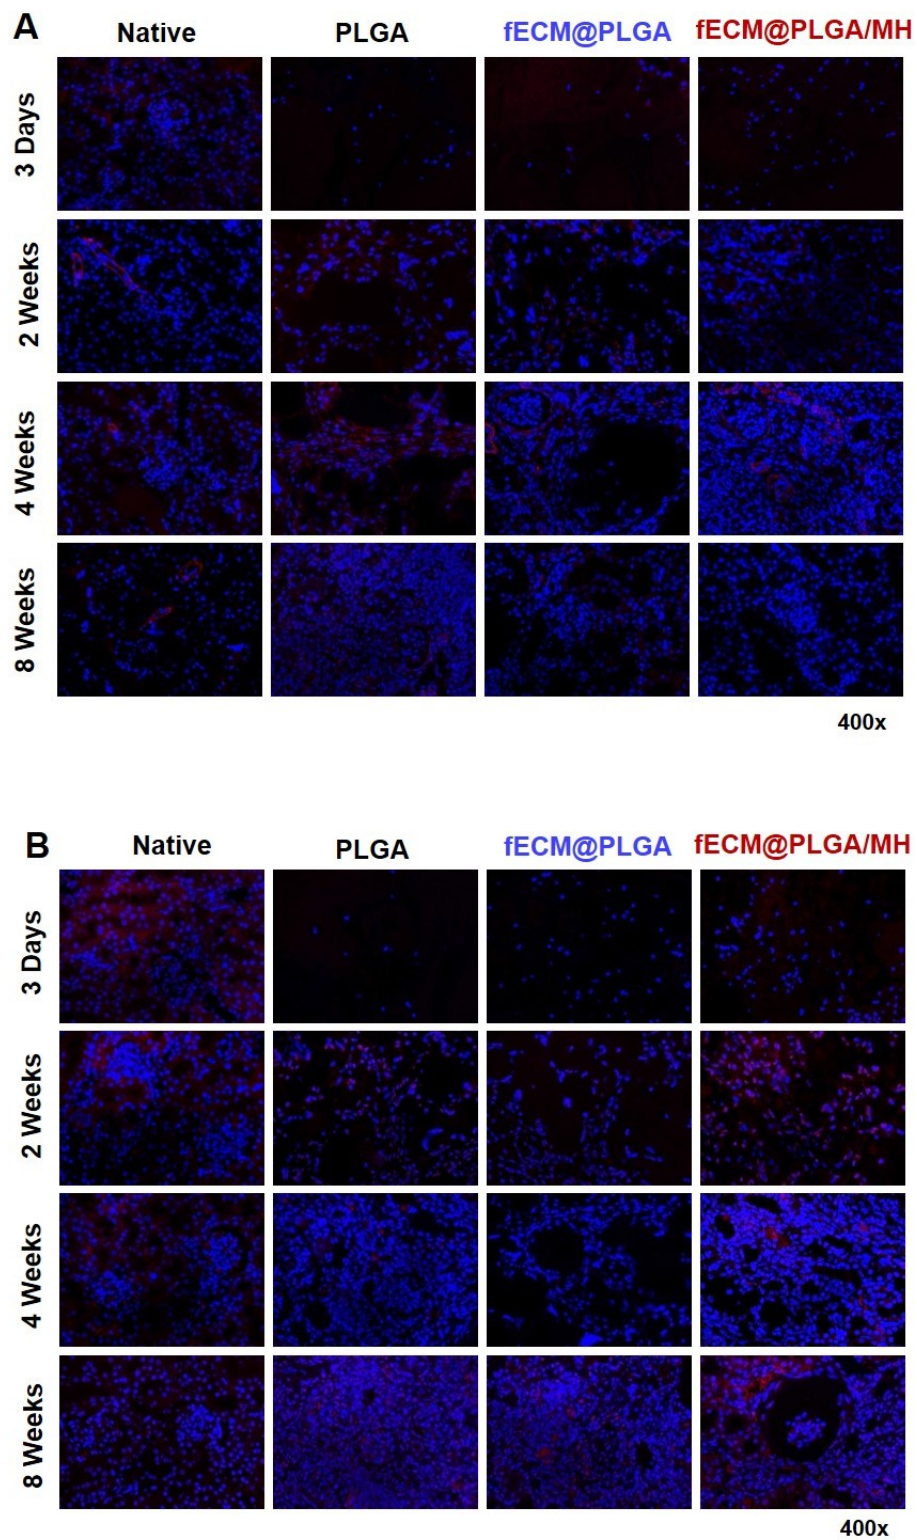

**Figure S4.** *In vivo* regeneration of implanted matrix covered scaffolds. Fluorescent images obtained by immunostaining of (A)  $\alpha$ -SMA and (B) Pax2.



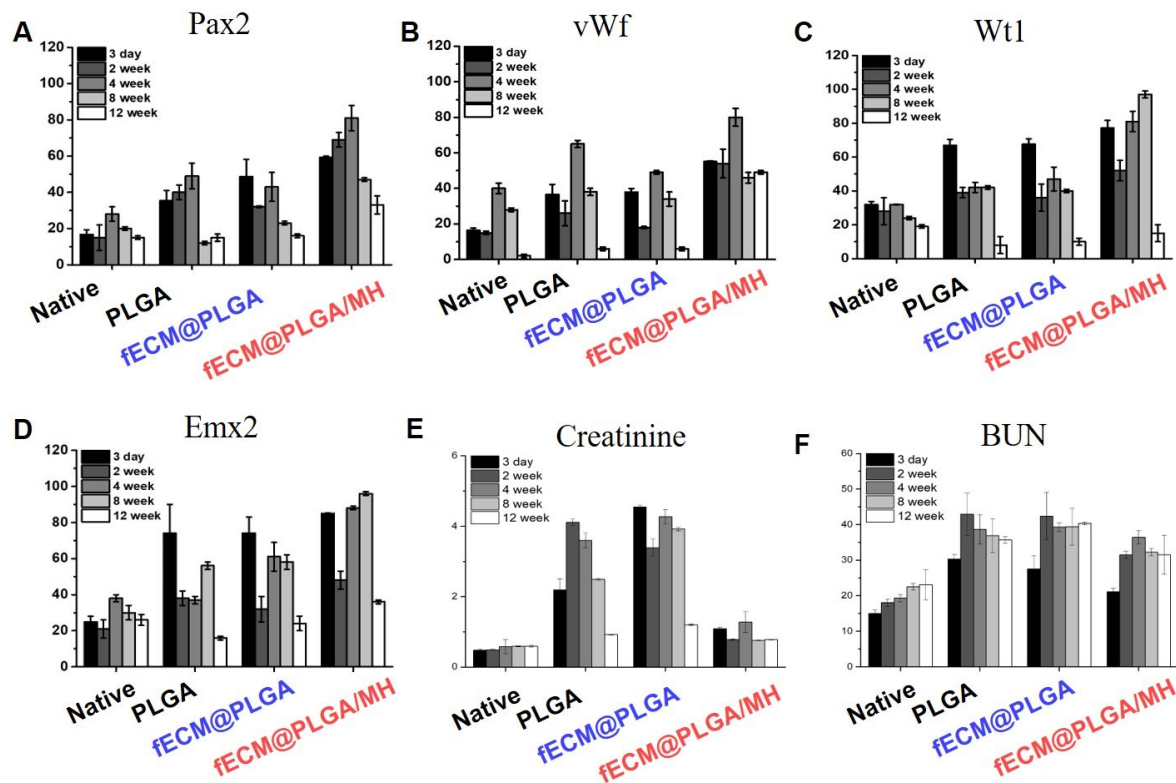

**Figure S5.** *In vivo* inflammation of implanted extracellular scaffolds. Gene expression analysis of pro-regeneration markers (A) pair box gene 2 (Pax2), (B) von Willebrand factor (vWf) and functional regeneration markers (C) Wilms tumor 1 (Wt1), (D) empty spiracles homeobox 2 (Emx2) by real-time PCR. Renal functions are evaluated after implanting scaffolds into the kidney during 2 and 8 weeks by determination of (E) creatinine and (F) blood urea nitrogen (BUN) in the blood.
